# 1 **Positive selection of neuregulin 1 (NRG-1) among three long-lived vertebrates**

2

3 Neil Copes<sup>1</sup> and Clare-Anne Edwards Canfield<sup>2</sup>

4

5 <sup>1</sup>Moirai Conservation and Research, Dade City, FL, USA

6 <sup>2</sup>Moirai Conservation and Research, Dade City, FL, USA

7

8 Corresponding author<sup>1</sup>

9 Neil Copes

10 34308 Ruffing Road, Dade City, FL 33526, USA

11 Email address: [neilcopes@moiraiconservation.org](mailto:neilcopes@moiraiconservation.org)

12

## 13 **Abstract**

14

15 Maximum lifespan is a species-specific trait that can vary over a broad range, even between  
16 closely related species. We selected the few long-lived vertebrates for which reference genome  
17 data is available, specifically the blue whale *Balaenoptera musculus* and the Pinta Island tortoise  
18 *Chelonoidis abingdonii*. For these species, we used established methods of CpG dinucleotide  
19 analysis and allometric estimation to compare predicted maximum longevity with the maximum  
20 longevities reported in the AnAge database and in the literature. Additionally, we compared  
21 protein sequences between these species and closely related short-lived vertebrates. Orthologous  
22 protein sequences with higher pairwise alignment scores between either long-lived species, or  
23 between short-lived species, than between long-lived and short-lived relatives were identified.  
24 High-scoring orthologs were investigated for evidence of positive selection and convergent  
25 evolution, and for evidence of deleterious effect on phenotype. Analysis revealed no evidence for  
26 either convergent evolution or predicted deleterious protein sequences changes within these  
27 orthologs, however evidence of positive selection was identified in two genes: NRG-1 and  
28 GALNT17. Further comparison to protein sequences from the long-lived bowhead whale  
29 (*Balaena mysticetus*) additionally supported NRG-1 as exhibiting evidence of positive selection  
30 among the selected long-lived species.

31

## 32 **Introduction**

33

34 Lifespans vary much less within species than they do between species. For example, as of 2013  
35 the average worldwide human life expectancy beyond the age of 10 was 77.4 years, with a  
36 standard deviation of only 14.7 years (Edwards 2013). By contrast, the range of maximum  
37 lifespans among vertebrates includes three months for the east African fish, *Nothobranchius*  
38 *furzeri*, 211 years for the bowhead whale (George, et al. 1999; Valdesalici and Cellerino 2003)  
39 and at least 272 years for the Greenland shark (Nielsen, et al. 2016). This range expands further  
40 if we include nonvertebrate animals such as the ocean quahog clam (*Arctica islandica*), which  
41 can live at least four centuries (Wanamaker Jr, et al. 2008), and the deep-sea oyster  
42 *Neopycnodonte zibrowii*, which can live at least five centuries (Wisshak, et al. 2009). As with  
43 any species-specific trait, maximum lifespan can be assumed to be at least partially genetic in  
44 origin and therefore subject to change through evolution, either via positive selection, negative  
45 purifying selection, or through neutral genetic drift. This assumption is supported by the  
46 numerous single gene mutations known to extend the lifespan of laboratory mice, fruit flies, and

47 nematodes (Ladiges, et al. 2009), and by the characteristic changes in epigenetic profile and gene  
48 expression known to accompany the aging process (De Paoli-Iseppi, et al. 2017; Mayne, et al.  
49 2019; Levine, et al. 2020; Robeck, et al. 2021). Given these aspects of lifespan and aging, it is  
50 noteworthy that maximum lifespans can vary dramatically between closely related species  
51 (Gorbunova, Bozzella and Seluanov 2008). Furthermore, observations support the possibility  
52 that the aging process is intrinsically different between long-lived and short-lived animals  
53 (Hausmann, et al. 2003; Copes, et al. 2015). If lifespans and aging are genetically influenced,  
54 and closely related species can vary widely in lifespan, then it is reasonable to predict that for  
55 some species a relatively small number of genetic changes are required to produce large changes  
56 in aging and lifespan, whether these changes are through nonsynonymous mutations or through  
57 alterations to gene expression.

58  
59 The AnAge database is an often-cited source for species maximum lifespans, with currently over  
60 3,700 recorded maximum lifespan estimates (Tacutu, et al. 2013). These estimations are a  
61 consensus compiled from a wide variety of sources, including wild and captive species, from  
62 large and small samples, under diverse conditions. Accordingly, the quality of the data is  
63 categorized by the project curators as *high*, *acceptable*, *questionable*, or *low* depending on the  
64 source. Comparison between the maximum longevity of any of these species and *Homo sapiens*  
65 is somewhat challenging given that our knowledge of human lifespan is based on hundreds of  
66 millions of observations, whereas our knowledge of other species is often based on hundreds or  
67 thousands of observations at best (Austad 2010). The estimated maximum longevity for any  
68 species is partially a function of the number of observations. For example, only about one out of  
69 every 10,000 humans lives to the age of 100 (Perls, et al. 2002; Austad 2010). An estimate of  
70 human maximum longevity based on the observed lifespan of only 1,000 randomly selected  
71 individuals would then likely fall short of 100 years. Therefore, it can be assumed that for  
72 species with few observations, the estimated maximum lifespan is likely closer to the average  
73 life expectancy than the true maximum for that species. If human life expectancy is used for  
74 comparison, AnAge contains *high* or *acceptable* estimates for 45 chordate species with  
75 maximum lifespans longer than humans, and 20 with lifespans greater than the human life  
76 expectancy upper 95% confidence interval (106.2 years; human life expectancy, plus 1.96 times  
77 the standard deviation).

78  
79 For our study, we examined two chordate species with lifespan estimates greater than this 106.2-  
80 year threshold, and with available high-quality gene and protein sequence information – the blue  
81 whale (*Balaenoptera musculus*) and the Pinta Island tortoise (*Chelonoidis abingdonii*). Notably,  
82 these two animals fall within separate taxonomic classes and are separated evolutionarily by  
83 approximately 320 million years. We then identified closely related short-lived animals as points  
84 of comparison, using the beluga whale *Delphinapterus leucas* and the Pacific white-sided  
85 dolphin *Lagenorhynchus obliquidens* as short-lived relatives of *B. musculus* (both of which live  
86 less than 50 years), and the Chinese pond turtle or Reeves' turtle *Mauremys reevesii* as a short-  
87 lived relative of *C. abingdonii* (maximum lifespan: 24.2 years). Investigation of orthologous  
88 proteins among these species revealed no evidence of convergent evolution or deleterious effect  
89 on phenotype. However, evidence of positive selection was observed in a small set of genes in  
90 both long-lived species, as compared to their shorter-lived relatives. The bowhead whale  
91 (*Balaena mysticetus*) is a long-lived species, with a maximum longevity of 211 years. This  
92 species lacks an annotated genome available through the NCBI, but gene and protein sequence

93 files are available through the Bowhead Whale Genome Resource ([http://www.bowhead-](http://www.bowhead-whale.org/)  
94 [whale.org/](http://www.bowhead-whale.org/)) (Keane, et al. 2015). After including *B. mysticetus* in our investigation of positive  
95 selection, neuregulin-1 (NRG-1) remained as the only ortholog showing evidence of positive  
96 selection among all selected long-lived animals.

97

## 98 **Materials and Methods**

99

100 **Lifespan Categorization:** Maximum longevity data was obtained from the publicly available  
101 AnAge database (Tacutu, et al. 2013), which contains a curated list of maximum longevity  
102 estimates for 4,244 species (build 14). The AnAge dataset is constructed both from animals  
103 observed in the wild and from those maintained in captivity, and the estimates are ranked based  
104 on the quality of the supporting evidence (ranked either as *high*, *acceptable*, *low*, or  
105 *questionable*). We further categorized maximum longevity estimates based on comparison to the  
106 worldwide average human life expectancy. Using an average human life expectancy past age ten  
107 of 77.4 years,  $\pm 14.7$  years standard deviation (Edwards 2013), we calculated the 95%  
108 confidence interval for human life expectancy as the range from 48.6 years to 106.2 years ( $\pm$   
109  $1.96 \times 14.7$  years). Animals with a reported maximum longevity beyond this 106.2-year cutoff  
110 were categorized as *long-lived*. Using this same approach, *short-lived* animals were defined as  
111 those with a reported maximum longevity below the 48.6-year cutoff, and *midrange* lifespan was  
112 defined as falling within the inclusive 48.6-year to 106.2-year range. This categorization scheme  
113 is admittedly less than ideal given that humans fall into the long-lived category when including  
114 the many known supercentenarians, and especially when including the recorded human  
115 maximum longevity of 122.5 years (Robin-Champigneul 2020). This categorization scheme also  
116 has the additional weakness of being based on the comparison of maximum animal longevity to  
117 average human life expectancy, which are two different types of measures. Additionally,  
118 comparison between the maximum longevity of any of these species and *Homo sapiens* is  
119 somewhat challenging given that our knowledge of human lifespan is based on hundreds of  
120 millions of observations, whereas our knowledge of other species is often based on hundreds or  
121 thousands of observations at best (Austad 2010). The estimated maximum longevity for any  
122 species is partially a function of the number of observations. For example, only about one out of  
123 every 10,000 humans lives to the age of 100 (Perls, et al. 2002; Austad 2010). An estimate of  
124 human maximum longevity based on the observed lifespan of only 1,000 randomly selected  
125 individuals would then likely fall short of 100 years. Therefore, it can be assumed that for  
126 species with few observations, the estimated maximum lifespan is likely closer to the average  
127 life expectancy than the true maximum for that species. In other words, examples of extreme  
128 human longevity are assumed to be over-represented in the available observations while species-  
129 specific examples of extreme animal longevity are likely underrepresented, which implies that  
130 average human life expectancy and reported animal maximum longevity should be closely  
131 comparable in many instances.

132

133 **Selection of Species for Analysis:** Animals were selected for initial analysis based on the  
134 criteria of having a maximum longevity estimate available from AnAge ranked as *high* or  
135 *acceptable*, and having an annotated reference genome available through the National Center for  
136 Biotechnology Information (NCBI). To be included, an animal also had to be categorized as  
137 follows: (1) long-lived, or (2) short-lived and the closest available phylogenetic relative to a  
138 long-lived animal. To find available candidates, the AnAge database was cross-referenced with

139 evolutionary divergence times found in the TimeTree database (Hedges, Dudley and Kumar  
140 2006; Kumar and Hedges 2011; Hedges, et al. 2015; Kumar, Stecher, et al. 2017). The NCBI  
141 Entrez Programming Utilities API was accessed to find FTP links for downloading eukaryotic  
142 reference genome files. All files were downloaded January 7<sup>th</sup>, 2021. Among the long-lived  
143 species, only seven currently have genome files available from the NCBI and only two have  
144 protein sequence files (*Balaenoptera musculus* and *Balaenoptera physalus*). Of these two  
145 species, only the blue whale, *Balaenoptera musculus*, has an annotated reference genome  
146 available from NCBI. To expand the list of species for possible analysis, a literature search was  
147 performed, which revealed the Pinta Island Tortoise, *Chelonoidis abingdonii*, as having a  
148 reference sequence and protein sequence files available from the NCBI, and a maximum  
149 longevity estimated to overlap the 106.2-year threshold (100-years to 120-years) (Mayne, et al.  
150 2019; Quesada, et al. 2019). Short-lived relatives for *B. musculus* and *C. abingdonii* were  
151 selected following a similar methodology. The TimeTree database was used to find species that  
152 (1) share a most recent common ancestor (MRCA) with *B. musculus* and *C. abingdonii* within  
153 the last 100 million years (Hedges, Dudley and Kumar 2006; Kumar and Hedges 2011; Hedges,  
154 et al. 2015; Kumar, Stecher, et al. 2017), (2) have a *high or acceptable* quality maximum  
155 longevity less than 48.6 years (less than the lower range of the 95% CI for human life  
156 expectancy) as reported in the AnAge database, and (3) have a reference sequence and protein  
157 file available from NCBI. Of these species, the closest relatives were chosen based on the  
158 identified time to the most recent common ancestor (TMRCA; Table 1) and consist of  
159 *Delphinapterus leucas* (beluga whale) and *Lagenorhynchus obliquidens* (Pacific white-sided  
160 dolphin) as the most-closely related short-lived species to *B. musculus*, and *Mauremys reevesii*  
161 (Chinese pond turtle or Reeves' turtle) as the most-closely related short-lived species to *C.*  
162 *abingdonii*. To further investigate orthologs with evidence of positive selection, one additional  
163 long-lived species was identified for analysis. The bowhead whale (*Balaena mysticetus*) has a  
164 reported lifespan of 211 years (George, et al. 1999), with a CpG dinucleotide estimated lifespan  
165 of above the 205-year calibration range of the model (267.9 years; see “Lifespan Estimation  
166 Using Gene Promoter CpG Density” below). *B. mysticetus* currently lacks inclusion among the  
167 NCBI databases, however protein and gene sequence files were downloaded from The Bowhead  
168 Whale Genome Resource (<http://www.bowhead-whale.org/>) (Keane, et al. 2015).

169

170 **Lifespan Estimation Using Gene Promoter CpG Density:** Lifespan estimation based on  
171 genetic sequence was performed using the method published by Dr. Benjamin Mayne (Mayne, et  
172 al. 2019). In summary, the CpG density within 42 individual gene promotor sequences was  
173 reported to correspond to vertebrate lifespan within taxonomic classes. The region -499 to +100  
174 nt for each promoter was queried against the selected genome using BLAST v2.10.1 (Altschul, et  
175 al. 1997) The following command parameters were used:

176

```
177 blastn -query <human promoters.fasta> -db <target genome> -task megablast -max_hsp 1 -  
178 outfmt "6 qseqid qlen qstart qend sacc sstart send evaluate bitscore length pident qcovhsp qseq  
179 sseq" -culling_limit 1 > <output file>
```

180

181 For each high-scoring segment pair (HSP), CpG density was calculated as the number of CpG  
182 dinucleotides identified within the corresponding region of the subject sequence, divided by the  
183 length of the HSP. The *raw density* was then calculated as follows:

184

185 
$$\text{raw density} = k + \sum_{i=0}^n (d_i \times p_i)$$

186  
187 Where  $k$  is an intercept value,  $n$  is the number of HSPs identified,  $d$  is the CpG density, and  $p$  is a  
188 unique coefficient associated with each gene promoter. Using the raw density, lifespan was  
189 estimated as:

190  
191 
$$\ln(\text{maximum lifespan}) = -4.38996 + 2.57328x + ax + b$$

192  
193 Where  $x$  is the raw density, and  $a$  and  $b$  are coefficients associated with taxonomic class (for  
194 *Reptilia*,  $a = -0.48958$  and  $b = 1.17281$ ; for *Mammalia*,  $a = -0.92888$  and  $b = 2.33508$ ). For long-  
195 lived non-mammalian vertebrates, the maximum lifespan value was then multiplied by  $x$ .

196

197 **Lifespan Estimation Using Allometry:** Adult body mass has been reported to positively  
198 correlate with vertebrate lifespan across taxonomic groups (Promislow 1993; de Magalhães,  
199 Costa and Church 2007). To calculate estimated maximum lifespan based on body mass, the  
200 allometric equation reported by de Magalhães et. al. (2007) for mammals, birds, reptiles, and  
201 amphibians was used as follows:

202  
203 
$$\text{maximum lifespan} = 6.32 \times M^{0.139}$$

204

205 Where  $M$  is the species adult body mass in grams ( $r^2 = 0.40$  for correlation with lifespan). This  
206 equation was used to estimate maximum lifespan for *Balaenoptera musculus*, *Delphinapterus*  
207 *leucas*, and *Lagenorhynchus obliquidens* given that the other equations for mammals reported by  
208 the authors specifically exclude cetaceans. For *Chelonoidis abingdonii* and *Mauremys reevesii*  
209 the following reptile-specific equation was used ( $r^2 = 0.35$ ):

210

211 
$$\text{maximum lifespan} = 10.4 \times M^{0.137}$$

212

213 The longevity quotient (LQ) was also calculated for all species as the reported lifespan divided  
214 by the allometrically estimated lifespan (Yu, et al. 2021). This quotient provides a measure of  
215 longevity scaled to body mass, with values above or below 1.0 being long-lived or short-lived  
216 respectively, relative to the body mass. Adult body mass was obtained from AnAge for *B.*  
217 *musculus*, *D. leucas*, and *L. obliquidens*, and from the reptile body size dataset from Gorman and  
218 Hone et. al. 2012 for *C. abingdonii* and *M. reevesii* (O'Gorman and Hone 2012).

219

220 **Identification of Orthologs:** For identifying protein sequence orthologs, top scoring reciprocal  
221 best hits (RBHs) were found between all pairs of species using protein sequence files and  
222 BLAST v2.10.1 (Altschul, et al. 1997; Tatusov, Koonin and Lipman 1997; Bork, et al. 1998;  
223 Ward and Moreno-Hagelsieb 2014) using the following parameters:

224

225 `blastp -query <query species.fasta> -db <target proteome.fasta> -outfmt "6 qaccver saccver`  
226 `salltitles" -out <output file> -matrix <substitution matrix> -evalue 1e-6 -max_hsps 1 -`  
227 `num_alignments 1 -num_threads 19 -soft_masking true -subject_besthit -use_sw_tback`

228

229 For the BLAST searches, the substitution matrix was chosen based on the evolutionary  
230 divergence times between the species pairs as reported in the TimeTree database (Hedges,  
231 Dudley and Kumar 2006; Kumar and Hedges 2011; Hedges, et al. 2015; Kumar, Stecher, et al.  
232 2017), and as previously suggested for maintaining an acceptable balance between BLAST  
233 sensitivity and HSP length (Pearson 2013). BLOSUM80 was used for pairs of species that  
234 diverged by 200 million years or less, and BLOSUM62 was used for species that diverged by  
235 more than 200 million years. For each pair of species, the BLAST search was performed twice,  
236 switching the query and subject species FASTA files for the second search. RBHs were then  
237 identified by using a custom JavaScript script to search both BLAST output files for proper  
238 matches. Proteins were determined to be orthologs if: (1) their accession numbers were exactly  
239 matched to HSPs within both output files, or (2) they were matched to isoforms of the same  
240 protein, as determined by NCBI FASTA file deflines.

241

242 **Graph Analysis of Homologs:** Semi-global protein sequence alignments were generated for  
243 each RBH using BLOSUM62 with a gap open penalty of 11 and a gap extension penalty of 1 for  
244 all internal gaps. Where homologs involved isoforms of the same protein, the longest sequence  
245 isoform from both species was used for the alignment. The score, query sequence, subject  
246 sequence, accession numbers, and deflines for each alignment were then saved as output for each  
247 pair of species. Sets of orthologous proteins were selected for further analysis by constructing  
248 graphs representing shared homologies. For this process, separate proteins were represented as  
249 graph nodes. Each semi-global alignment between homologous proteins pairs was then  
250 represented as a line connecting those two nodes. A set of nodes was determined to be valid if  
251 (1) a continuous path could be traced through one node from each species by following the  
252 connecting lines, and (2) each node was directly linked to all other nodes within that set by one  
253 line. Using this method allowed for individual nodes to participate in more than one valid set,  
254 and for each set to consist exclusively of mutually homologous proteins.

255

256 To investigate possible protein sequence-level similarities between the two long-lived species,  
257 orthologous sets were selected based on having higher protein sequence alignment scores  
258 between the two long-lived species (*B. musculus* and *C. abingdonii*) than between them and any  
259 of the short-lived species (i.e., higher scores along line *i* of the graph in Supplemental Figure S1  
260 panel A than along lines *ii*, *iii*, and *v*). Similarity ratios were also calculated for each orthologous  
261 set dividing the alignment score for the two long-lived species (score along line *i*) by the  
262 alignment score for a long-lived species and a closely related short-lived species (score along  
263 lines *ii*, *iii*, and *v*). Using this method, three ratios were calculated for each set of orthologs.  
264 When calculated for all orthologous sets, ratios exhibited a Pareto distribution as determined by  
265 the `fitdistrplus` package in R. Estimation of distribution shape and scale permitted the calculation  
266 of associated *p-values*. Multiple comparisons were corrected using the Benjamini-Hochberg  
267 method ( $p < 0.05$ ;  $FDR < 0.1$ ), and orthologs with ratios greater than the threshold were  
268 excluded. A similar methodology was used to investigate the selected short-lived animals (i.e.,  
269 identification of scores higher along lines *v*, *ix*, and *x* than along lines *ii*, *iii*, and *v*). For the short-  
270 lived species, any orthologs that were not identified in all comparisons were excluded (see  
271 Supplemental Table S1 for a complete high-scoring ortholog list).

272

273 **Tree Production and Visualization:** For initial analysis of the entire array of graphs (sets of  
274 orthologs), a median score was calculated between each pair of species from the homologous  
275 protein sets. Unweighted pair group method with arithmetic mean (UPGMA) was then used to  
276 construct a phylogenetic tree, with the negative median scores used as a substitution for distance.  
277 Visualization of trees was performed by uploading Newick files to Tree Viewer  
278 (<http://et toolkit.org/treeview/>) (Heurta-Cepas, Serra and Bork 2016).  
279

280 **Identification of Positively Selected Genes:** For selected sets of orthologs, protein multiple  
281 sequence alignments were generated using T-Coffee, version 13.45.0.4846264 (Notredame,  
282 Higgins and Heringa 2000), and nucleotide alignments were generated from the resulting files  
283 using the nucleotide sequences downloaded from the NCBI and PAL2NAL version 14 (Suyama,  
284 Torrents and Bork 2006). Positive selection was tested using PAML version 4.9 (Yang 2007) and  
285 the phylogenetic tree for the five selected species generated from the TimeTree database  
286 (Supplemental Figure S1 panel C). The branch site model for codon evolution was used (model =  
287 2; NSites = 2). For each analyzed set of orthologs, a model allowing for positive selection of  
288 codons (fix\_omega = 0) was compared to the null model of neutral or purifying selection  
289 (fix\_omega = 1; omega = 1). Likelihood ratio tests (LRTs) were performed by PAML, and  
290 comparison of LRTs was calculated using a  $\chi^2$  test with an assumed 50:50 distribution and a  
291 point mass at zero. Significance was determined after correcting for multiple comparisons using  
292 the Benjamini-Hochberg method ( $p < 0.05$ ) with a false discovery rate (FDR) cutoff of 0.1.  
293 Positive selection was tested seven different times for each selected set of orthologs; once with  
294 the long-lived species selected as the foreground branches; once with the short-lived species  
295 selected as the foreground branches; and once with each of the five separate species selected as a  
296 foreground branch. Orthologs were considered for further analysis if they displayed positive  
297 selection with the long-lived species (separately and as a group), or with the short-lived species  
298 (separately and as a group). Given that phylogenetic tree discordance can affect the ability of  
299 PAML to detect positive selection (Mendes and Hahn 2016), MrBayes version 3.2.6 (Ronquist  
300 and Huelsenbeck 2003) was used to generate a phylogenetic tree for each selected set of  
301 orthologs (lset nst=6 rates = invgamma; mcmc ngen=10000 samplefreq=10; sump burnin=250).  
302 The PAML positive selection tests were then performed again using the tree obtained from  
303 MrBayes when the topology of the phylogenetic tree differed from the one obtained from  
304 TimeTree. Orthologs were excluded from further analysis if they did not display positive  
305 selection using the phylogenetic tree generated from MrBayes.

306  
307 For eukaryotic organisms, species-specific isoforms and the incomplete identification of  
308 isoforms can both lead to alignment of nonhomologous regions. These regions of misalignment  
309 then risk being interpreted as evidence of evolution during dN/dS analysis, increasing the  
310 likelihood of false positives (Villanueva-Cañas, Laurie and Albà 2013). To compensate for this  
311 risk, orthologs with evidence of positive selection under all the above conditions were subjected  
312 to manual inspection. Isoforms were examined from each species, and if an alternative presented  
313 a better alignment it was selected, otherwise the longest isoform was retained. New multiple  
314 sequence alignments were generated where appropriate, and the alignments were inspected and  
315 manually adjusted where it was deemed necessary. Orthologs that were updated by manual  
316 inspection were then re-subjected to the testing procedure outlined above.  
317

318 **Prediction of Deleterious Proteins:** Multiple sequence alignments generated from T-Coffee  
319 (see above) were analyzed to identify sequence locations where either (1) the long-lived species  
320 sequences were identical and different from any short-lived species at that sequence location, or  
321 (2) the short-lived species sequences were identical and different from any long-lived species at  
322 that sequence location. For these qualifying locations, files were generated that contained comma  
323 separated variant information for each species. Protein FASTA files and variant files were then  
324 supplied to PROVEAN version 1.1 for estimation of phylogeny-corrected effect prediction  
325 (Choi, et al. 2012). PROVEAN is designed for binary classification of sequence variants as  
326 either *neutral* or *deleterious*, with scores below -2.282 providing a 79% accuracy in the  
327 classification of deleterious proteins against a UniProt human variant dataset. For the selected  
328 ortholog sets, a conservative threshold score of -5.0 was chosen for classification given its  
329 previous successful use in species-to-species comparisons (Burga, et al. 2017). Variants were  
330 considered deleterious if they produced a score below this threshold in all species examined.

331

332 **Gene Ontology:** Over-representation analysis of gene ontology terms and KEGG pathways was  
333 performed using GeneTrail2 (Stöckel, et al. 2016), with upper-tailed hypothesis testing and  
334 Benjamini-Hochberg multiple comparison correction ( $p < 0.05$ ).

335

## 336 **Results.**

337

338 **Independent estimation of lifespan for selected species:** CpG dinucleotide estimation of  
339 maximum lifespan for the chosen species corresponded closely to those reported by AnAge ( $r^2 =$   
340  $0.818$ ;  $p$ -value =  $0.063$ ; Table 2) except for *B. musculus*, which produced an estimate greater  
341 than the 205-year upper calibration range used in the original method. The CpG dinucleotide  
342 estimation method also over-estimated the lifespan for *M. reevesii* as 52.5 years, placing this  
343 species in the *midrange* lifespan category defined above (48.6 years to 106.2 years). Allometric  
344 lifespan estimation based on body mass underestimated maximum longevity for *B. musculus*, *L.*  
345 *obliquidens*, and *C. abingdonii*, and this underestimation is reflected in the longevity quotient  
346 (LQ) measures for these three species. The LQ results for these three species suggest a greater  
347 lifespan than expected from body mass alone. However, an analysis of 987 mammalian species  
348 by Yu et. al. (2021) provides a standard deviation of  $\pm 0.57$  for mammal LQ, which places the  
349 LQ for *B. musculus* and *L. obliquidens* within the usual variation observed for this taxonomic  
350 group.

351

352 **Orthologous protein alignment:** The pattern of alignment scores matched the known  
353 evolutionary relationship among these species, with higher median scores present between the  
354 two reptiles (*C. abingdonii* and *M. reevesii*) and among the three Cetaceans (*B. musculus*, *D.*  
355 *leucas*, and *L. obliquidens*). Median alignment scores also closely correlated with TMRCAs  
356 values found in the TimeTree database ( $r^2 = 0.997$ ;  $p$ -value =  $2.485 \times 10^{-11}$ ). Since each set of  
357 orthologous proteins contains an all-to-all pairwise sequence alignment, we were able to generate  
358 a phylogenetic tree for these species using UPGMA and directly utilizing median scores as a  
359 distance metric (Supplemental Figure S1 panel B). The resulting tree matches closely with the  
360 phylogenetic tree for these species produced by the TimeTree database (Supplemental Figure S1  
361 panel C) and demonstrates that the distribution of protein alignment scores among the selected  
362 species reflects their overall evolutionary relationship. In total, 10 orthologs were identified as  
363 having a higher alignment score between long-lived species (*B. musculus* and *C. abingdonii*),

364 and 21 orthologs were identified as having a higher alignment score between short-lived species  
365 (*D. leucas*, *M. reevesii*, and *L. obliquidens*). Two orthologs appeared in both sets, actin-related  
366 protein 2 (ACTR2) and protein transport protein Sec61 subunit alpha (SEC61A), giving a total of  
367 29 unique proteins among the two sets (Supplemental Table S1).

368  
369 Over-represented gene ontology terms for these high-scoring proteins include ErbB signaling ( $p$   
370 = 0.0232) and ubiquitin mediated proteolysis ( $p$  = 0.0232) among the long-lived species, and  
371 acetylgalactosaminyltransferase activity ( $p$  = 0.0418) and ribosome binding ( $p$  = 0.0418) among  
372 the short-lived species. Investigation of the complete list of 29 orthologs was enriched in terms  
373 including PI3K/AKT activation ( $p$  = 0.0434), cellular response to hypoxia ( $p$  = 0.0031), cellular  
374 responses to stress ( $p$  = 0.0182), adaptive immune system ( $p$  =  $9.02 \times 10^{-6}$ ), Toll-like receptors  
375 cascades ( $p$  = 0.0453), class I MHC mediated antigen processing ( $p$  = 0.0016), and DNA  
376 methylation ( $p$  = 0.0464; see Supplemental Table S2).

377  
378 **Deleterious effect on phenotype:** Analysis of the multiple sequence alignments for each of  
379 these orthologs did reveal a series of protein sequence locations in three of the 29 orthologs that  
380 were either (1) identical at that location in both long-lived species and different at that location  
381 from the short-lived species, or (2) identical in all short-lived species and different at that  
382 location from either of the long-lived species sequences. Identification of these locations  
383 generated a series of sequence features that were consistent within each lifespan category.  
384 PROVEAN version 1.1 was used to predict possible functional effects of these sequence features  
385 (Choi, et al. 2012). For each of the three orthologs with characteristic long-lived or short-lived  
386 sequence features, we examined the predicted impact of applying that feature as a sequence  
387 variant across the selected species. Using the conservative score threshold of -5.0, all identified  
388 sequence features were reported as neutral.

389  
390 **Positive selection and convergent evolution:** Among these 29 orthologs, evidence of possible  
391 positive evolutionary selection was investigated using dN/dS analysis, and the software PAML  
392 version 4.9 (Yang 2007). Three orthologs were found with statistically significant evidence of  
393 positive selection reported by PAML in tested foreground branches, consisting of NRG-1,  
394 GALNT17, and SCFD1. Pro-neuregulin-1, membrane-bound isoform (NRG-1) and N-  
395 acetylgalactosaminyltransferase 17 (GALNT17) were found to have significant positive selection  
396 exclusively among the long-lived species, while Sec1 family domain-containing protein 1  
397 (SCFD1) was positively selected among all species examined except for *L. obliquidens*  
398 (Supplemental Table S3). One additional ortholog, phospholipid phosphatase-related protein  
399 type 1 (PLPPR1), was found to have partial evidence, but produced a  $p$ -value short of the  
400 multiple comparison corrected threshold when using *B. musculus* as a foreground branch in the  
401 analysis ( $p$  = 0.181). The possibility of sequence-level convergent evolution was investigated,  
402 however none of the sequence locations reported by the PAML naïve empirical Bayes algorithm  
403 with a posterior probability above 95% were identical in either the long-lived or short-lived  
404 species exclusively.

405  
406 Fewer protein sequences are available for *B. mysticetus* compared to the other species used (e.g.,  
407 22,672 sequences for *B. mysticetus* versus 52,259 for *B. musculus*). Of the three orthologs with

408 evidence of positive selection, GALNT17 was absent among the *B. mysticetus* sequences,  
409 leaving only NRG-1 and SCFD1 for analysis by PAML. Using *B. mysticetus* as a foreground  
410 branch in the analysis generated evidence of positive selection only for NRG-1.

411

## 412 **Discussion.**

413

414 Using PAML, we were able to detect evidence of positive selection in three of the examined  
415 orthologs, two of which (NRG-1 and GALNT17) showed evidence of positive selection  
416 exclusively with the long-lived species *B. musculus* and *C. abingdonii*. Notably, NRG-1 and  
417 GALNT17 are both associated with neural development and function (Mei and Xiong 2008;  
418 Weisner, et al. 2019). NRG-1 acts in vivo as a direct ligand for ERBB3 and ERBB4, members of  
419 the epidermal growth factor receptor (EGFR) family of receptor tyrosine kinases. Variants of  
420 NRG-1 have been identified as possible risk factors for schizophrenia (Munafo, et al. 2006; Mei  
421 and Xiong 2008), and altered expression of NRG-1 in the brain appears to play a role in the  
422 pathophysiology of Alzheimer's disease (Jiang, et al. 2016; Mouton-Liger, et al. 2020).  
423 GALNT17 is less well characterized, but it is expressed in multiple cell types in the brain and  
424 serves as an N-acetylgalactosaminyltransferase that ultimately affects cell adhesion and motility,  
425 pinocytosis, and lamellipodia formation (Nakayama, et al. 2012). Deletion of GALNT17 occurs  
426 in Williams-Beuren syndrome, and likely contributes to the associated phenotype (Merla, et al.  
427 2002; Weisner, et al. 2019).

428

429 Of the two proteins with complete and significant evidence of positive selection among the long-  
430 lived animals, only NRG-1 has an identifiable ortholog in the current assembly of the bowhead  
431 whale genome. In total, NRG-1 displayed evidence of positive selection for all three long-lived  
432 animals (*B. musculus*, *B. mysticetus*, and *C. abingdonii*). No evidence was found suggesting  
433 convergent evolution for NRG-1 among these species, and no shared deleterious sequence  
434 features were predicted between *B. musculus* and *C. abingdonii*. No claim can be made here  
435 regarding the underlying source of positive selection, and this identification of positive selection  
436 in no way directly connects NRG-1 to the longevity of these species. However, it is noteworthy  
437 that intracellular NRG-1 signaling has been demonstrated to be neuroprotective following brain  
438 ischemia (Navarro-González, Huerga-Gómez and Fazzari 2019), and NRG-1 was identified as a  
439 candidate human longevity gene in a study examining variants found among exceptionally long-  
440 lived siblings (Cash, et al. 2014). The three long-lived animals examined in our study are a  
441 diverse group, including a terrestrial reptile and two aquatic mammals from separate genera.  
442 Besides an extended lifespan, all three species are physically larger than the short-lived animals  
443 we used for comparison, which highlights the possibility that positive selection of NRG-1,  
444 GALNT17, and PLPPR1 could be a signature of enlarged brain volume. It is especially  
445 suggestive then that cerebellar expression of NRG-1 has been found to positively correlate with  
446 maximum lifespan among multiple rodent species independent of brain mass or body size  
447 (Edrey, et al. 2012).

448

## 449 **References**

450 Altschul, Stephen F, Thomas L Madden, Alejandro A Schäffer, Jinghui Zhang, Zheng Zhang,  
451 Webb Miller, and David J Lipman. 1997. "Gapped BLAST and PSI-BLAST: a new  
452 generation of protein database search programs." *Nucleic Acids Research* 25 (17): 3389–  
453 3402. doi:10.1093/nar/25.17.3389.

- 454 Austad, N S. 2010. "Methusaleh's Zoo: How Nature provides us with Clues for Extending  
455 Human Health Span." *Journal of Comparative Pathology* 142: S10-S21.  
456 doi:10.1016/j.jcpa.2009.10.024.
- 457 Bork, Peer, Thomas Dandkar, Yolande Diaz-Lazcoz, Frank Eisenhaber, Martijn Huynen, and  
458 Yanping Yuan. 1998. "Predicting Function: From Genes to Genomes and Back." *Journal*  
459 *of Molecular Biology* 283: 707-725. doi:10.1006/jmbi.1998.2144.
- 460 Bräuer, Anja, Nicolai E Savaskan, Hartmut Kühn, Siegfried Prehn, Olaf Ninnemann, and Robert  
461 Nitsch. 2003. "A new phospholipid phosphatase, PRG-1, is involved in axon growth and  
462 regenerative sprouting." *Nature Neuroscience* 6 (6): 572-578. doi:10.1038/nn1052.
- 463 Burga, Alejandro, Weiguang Wang, Eyal Ben-David, Paul C Wolf, Andrew M Ramey, Claudio  
464 Verdugo, Karen Lyons, Patricia G Parker, and Leonid Kruglyak. 2017. "A genetic  
465 signature of the evolution of loss of flight in the Galapagos cormorant." *Science* 356  
466 (6341): eaal3345. doi:10.1126/science.aal3345.
- 467 Cash, Timothy P, Guillermo Pita, Orlando Domínguez, Maria R Alonso, Leticia Moreno,  
468 Consuelo Borrás, Leocadio Rodríguez-Mañas, et al. 2014. "Exome sequencing of three  
469 cases of familial exceptional longevity." *Aging Cell* 13 (6): 1087-1090.  
470 doi:10.1111/accel.12261.
- 471 Choi, Youngwook, Gregory E Sims, Sean Murphy, Jason R Miller, and Agnes P Chan. 2012.  
472 "Predicting the Functional Effect of Amino Acid Substitutions and Indels." *PloS one* 7  
473 (10): e46688. doi:10.1371/journal.pone.0046688.
- 474 Copes, Neil, Clare Edwards, Dale Chaput, Mariam Saifee, Iosif Barjuca, Daniel Nelson, Alyssa  
475 Paraggio, et al. 2015. "Metabolome and proteome changes with aging in *Caenorhabditis*  
476 *elegans*." *Experimental Gerontology* 72: 67-84. doi:10.1016/j.exger.2015.09.013.
- 477 de Magalhães, João, Joanna Costa, and George M Church. 2007. "An analysis of the relationship  
478 between metabolism, developmental schedules, and longevity using phylogenetic  
479 independent contrasts." *The Journals of Gerontology Series A: Biological Sciences and*  
480 *Medical Sciences* 62 (2): 149-160. doi:10.1093/gerona/62.2.149.
- 481 De Paoli-Iseppi, Ricardo, Bruce E Deagle, Clive R McMahon, Mark A Hindell, Joanne L  
482 Dickinson, and Simon N Jarman. 2017. "Measuring Animal Age with DNA Methylation:  
483 From Humans to Wild Animals." *Frontiers in Genetics* 8: 106.  
484 doi:10.3389/fgene.2017.00106.
- 485 Edrey, Yael E, Diana Casper, Dorothee Huchon, James Mele, Jonathan A Gelfond, Deborah M  
486 Kristan, Eviatar Nevo, and Rochelle Buffenstein. 2012. "Sustained high levels of  
487 neuregulin-1 in the longest-lived rodents; a key determinant of rodent longevity." *Aging*  
488 *Cell* 11 (2): 213-222. doi:10.1111/j.1474-9726.2011.00772.x.
- 489 Edwards, Ryan D. 2013. "The cost of uncertain life span." *Journal of population economics* 26  
490 (4): 1485-1522. doi:10.1007/s00148-012-0405-0.
- 491 Fink, Kathren L, Francesc López-Giráldez, In-Jung Kim, Stephen M Strittmatter, and William  
492 BJ Cafferty. 2017. "Identification of Intrinsic Axon Growth Modulators for Intact CNS  
493 Neurons after Injury." *Cell Reports* 18 (11): 2687-2701.  
494 doi:10.1016/j.celrep.2017.02.058.
- 495 George, John C, Jeffrey Bada, Judith Zeh, Laura Scott, Stephen E Brown, Todd O'Hara, and  
496 Robert Suydam. 1999. "Age and growth estimates of bowhead whales (*Balaena*

- 497 mysticetus) via aspartic acid racemization." *Canadian Journal of Zoology* 77 (4): 571-  
498 580. doi:10.1139/z99-015.
- 499 Gorbunova, Vera, Michael J Bozzella, and Andrei Seluanov. 2008. "Rodents for comparative  
500 aging studies: from mice to beavers." *Age (Dordr)* 30 (2-3): 111-119.  
501 doi:10.1007/s11357-008-9053-4.
- 502 Haussmann, Mark F, David W Winkler, Kathleen M O'Reilly, Charles E Huntington, Ian CT  
503 Nisbet, and Carol M Vleck. 2003. "Telomeres shorten more slowly in long-lived birds  
504 and mammals than in short-lived ones." *Proceedings. Biological sciences* 270 (1522):  
505 1387-1392. doi:10.1098/rspb.2003.2385.
- 506 Hedges, Blair, Julie Marin, Michael Suleski, Madeline Paymer, and Sudhir Kumar. 2015. "Tree  
507 of Life Reveals Clock-Like Speciation and Diversification." *Molecular Biology and*  
508 *Evolution* 32 (4): 835–845. doi:10.1093/molbev/msv037.
- 509 Hedges, S Blair, Joel Dudley, and Sudhir Kumar. 2006. "TimeTree: a public knowledge-base of  
510 divergence times among organisms." *Bioinformatics* 22 (23): 2971–2972.  
511 doi:10.1093/bioinformatics/btl505.
- 512 Heurta-Cepas, Jamie, François Serra, and Peer Bork. 2016. "ETE 3: Reconstruction, Analysis,  
513 and Visualization of Phylogenomic Data." *Molecular Biology and Evolution* 33 (6):  
514 1635-1638. doi:10.1093/molbev/msw046.
- 515 Iweka, Chinyere, Sharada Tilve, Yasuhiro Katagiri, and Herbert M Geller. 2018. "The lipid  
516 phosphatase-like protein PLPPR1 increases cell adhesion by modulating RhoA/Rac1  
517 activity." *bioRxiv* 470914. doi:10.1101/470914.
- 518 Jiang, Qiong, Shuangxi Chen, Chengliang Hu, Peizhi huang, Huifan Shen, and Weijiang Zhao.  
519 2016. "Neuregulin-1 (Nrg1) signaling has a preventive role and is altered in the frontal  
520 cortex under the pathological conditions of Alzheimer's disease." *Molecular Medicine*  
521 *Reports* 14 (3): 2614-2624. doi:10.3892/mmr.2016.5542.
- 522 Keane, Michael, Jeremy Semeiks, Andrew Webb, Yang Li, Víctor Quesada, Thomas Craig,  
523 Lone Madsen, et al. 2015. "Insights into the Evolution of Longevity from the Bowhead  
524 Whale Genome." *Cell Reports* 10 (1): 112-122. doi:10.1016/j.celrep.2014.12.008.
- 525 Khalaf-Nazzal, Reham, Melissa A Stouffer, Robert Olaso, Leila Muresan, Audrey Roumegous,  
526 Virginie Lavilla, Wassila Carpentier, et al. 2017. "Early born neurons are abnormally  
527 positioned in the doublecortin knockout hippocampus." *Human Molecular Genetics* 26  
528 (1): 90–108. doi:10.1093/hmg/ddw370.
- 529 Kumar, Sudhir, and S Blair Hedges. 2011. "TimeTree2: species divergence times on the iPhone."  
530 *Bioinformatics* 27 (14): 2023–2024. doi:10.1093/bioinformatics/btr315.
- 531 Kumar, Sudhir, Glen Stecher, Michael Suleski, and S Blair Hedges. 2017. "TimeTree: A  
532 Resource for Timelines, Timetrees, and Divergence Times." *Molecular Biology and*  
533 *Evolution* 34 (7): 1812–1819. doi:10.1093/molbev/msx116.
- 534 Ladiges, Warren, Holly Van Remmen, Randy Strong, Yuji Ikeno, Piper Treuting, Peter  
535 Rabinovitch, and Arlan Richardson. 2009. "Lifespan extension in genetically modified  
536 mice." *Aging cell* 8 (4): 346-352. doi:10.1111/j.1474-9726.2009.00491.x.
- 537 Levine, Morgan, Ross A McDevitt, Margarita Meer, Kathy Perdue, Andrea Di Francesco,  
538 Theresa Meade, Colin Farrell, et al. 2020. "A rat epigenetic clock recapitulates

- 539 phenotypic aging and co-localizes with heterochromatin." *Elife* 9: e59201.  
540 doi:10.7554/eLife.59201.
- 541 Li, Weizhong, and Adam Godzik. 2006. "Cd-hit: a fast program for clustering and comparing  
542 large sets of protein or nucleotide sequences." *Bioinformatics* 22 (13): 1658–1659.  
543 doi:10.1093/bioinformatics/btl158.
- 544 Mayne, Benjamin, Oliver Berry, Campbell Davies, Jessica Farley, and Simon Jarman. 2019. "A  
545 genomic predictor of lifespan in Vertebrates." *Scientific reports* 9 (1): 1-10.  
546 doi:10.1038/s41598-019-54447-w.
- 547 Mei, Lin, and Wen-Cheng Xiong. 2008. "Neuregulin 1 in neural development, synaptic plasticity  
548 and schizophrenia." *Nature Reviews Neuroscience* 9 (6): 437-452. doi:10.1038/nrn2392.
- 549 Mendes, Fábio K, and Matthew W Hahn. 2016. "Gene Tree Discordance Causes Apparent  
550 Substitution Rate Variation." *Systematic Biology* 65 (4): 711–721.  
551 doi:10.1093/sysbio/syw018.
- 552 Merla, Giuseppe, Catherine Ucla, Michel Guipponi, and Alexandre Reymond. 2002.  
553 "Identification of additional transcripts in the Williams-Beuren syndrome critical region."  
554 *Human Genetics* 110 (5): 429-438. doi:10.1007/s00439-002-0710-x.
- 555 Mouton-Liger, François, Julien Dumurgier, Emmanuel Cognat, Claire Hourregue, Henrik  
556 Zetterberg, Hugo Vanderstichele, Eugeen Vanmechelen, et al. 2020. "CSF levels of the  
557 BACE1 substrate NRG1 correlate with cognition in Alzheimer's disease." *Alzheimer's  
558 Research & Therapy* 12 (1): 1-20. doi:10.1186/s13195-020-00655-w.
- 559 Munafo, MR, DL Thiselton, TG Clark, and J Flint. 2006. "Association of the NRG1 gene and  
560 schizophrenia: a meta-analysis." *Molecular psychiatry* 11 (6): 539-546.  
561 doi:10.1038/sj.mp.4001817.
- 562 Nakayama, Yoshiaki, Naosuke Nakamura, Sayoko Oki, Masaki Wakabayashi, Yasushi  
563 Ishihama, Ayumi Miyake, Nobuyuki Itoh, and Akira Kurosaka. 2012. "A Putative  
564 Polypeptide N-Acetylgalactosaminyltransferase/Williams-Beuren Syndrome  
565 Chromosome Region 17 (WBSCR17) Regulates Lamellipodium Formation and  
566 Macropinocytosis." *Journal of Biological Chemistry* 287 (38): 32222-32235.  
567 doi:10.1074/jbc.M112.370932.
- 568 Navarro-González, Carmen, Alba Huerga-Gómez, and Pietro Fazzari. 2019. "Nrg1 Intracellular  
569 Signaling Is Neuroprotective upon Stroke." *Oxidative medicine and cellular longevity*  
570 2019. doi:10.1155/2019/3930186.
- 571 Nickel, Gabrielle C, David L Tefft, Karrie Goglin, and Mark D Adams. 2008. "An Empirical  
572 Test for Branch-Specific Positive Selection." *Genetics* 179 (4): 2183-2193.  
573 doi:10.1534/genetics.108.090548.
- 574 Nielsen, Julius, Rasmus B Hedeholm, Jan Heinemeier, Peter G Bushnell, Jørgen S Christiansen,  
575 Jesper Olsen, Christopher Bronk Ramsey, et al. 2016. "Eye lens radiocarbon reveals  
576 centuries of longevity in the Greenland shark (*Somniosus microcephalus*)." *Science* 353  
577 (6300): 702-704. doi:10.1126/science.aaf1703.
- 578 Notredame, Cédric, Desmond G Higgins, and Jaap Heringa. 2000. "T-Coffee: A novel method  
579 for fast and accurate multiple sequence alignment." *Journal of molecular biology* 302 (1):  
580 205-217. doi:10.1006/jmbi.2000.4042.

- 581 O'Gorman, Eoin J, and David WE Hone. 2012. "Body Size Distribution of the Dinosaurs." *PLoS*  
582 *One* 7 (12): e51925. doi:10.1371/journal.pone.0051925.
- 583 Pearson, William R. 2013. "Selecting the Right Similarity-Scoring Matrix." *Current protocols in*  
584 *bioinformatics* 43 (1): 3-5. doi:10.1002/0471250953.bi0305s43.
- 585 Perls, Thomas T, John Wilmoth, Robin Levenson, Maureen Drinkwater, Melissa Cohen, Hazel  
586 Bogan, Erin Joyce, Stephanie Brewster, Louis Kunkel, and Annibale Puca. 2002. "Life-  
587 long sustained mortality advantage of siblings of centenarians." *Proceedings of the*  
588 *National Academy of Sciences* 99 (12): 8442-8447. doi:10.1073/pnas.122587599.
- 589 Promislow, Daniel EL. 1993. "On Size and Survival: Progress and Pitfalls in the Allometry of  
590 Life Span." *Journal of gerontology* 48 (4): B115-B123. doi:10.1093/geronj/48.4.B115.
- 591 Quesada, Víctor, Sandra Freitas-Rodríguez, Joshua Miller, José Pérez-Silva, Zi-Feng Jiang,  
592 Washington Tapia, Olaya Santiago-Fernández, et al. 2019. "Giant tortoise genomes  
593 provide insights into longevity and age-related disease." *Nature ecology & evolution* 3  
594 (1): 87-95. doi:10.1038/s41559-018-0733-x.
- 595 Robeck, Todd, Zhe Fei, Ake Lu, Amin Haghani, Eve Jourdain, Joseph Zoller, Caesar Li, et al.  
596 2021. "Multi-species and multi-tissue methylation clocks for age estimation in toothed  
597 whales and dolphins." *Communications Biology* 4: 642. doi:10.1038/s42003-021-02179-  
598 x.
- 599 Robin-Champigneul, François. 2020. "Jeanne Calment's Unique 122-Year Life Span: Facts and  
600 Factors; Longevity History in Her Genealogical Tree." *Rejuvenation Research* 23 (1): 19-  
601 47. doi:10.1089/rej.2019.2298.
- 602 Ronquist, Fredrik, and John P Huelsenbeck. 2003. "MrBayes 3: Bayesian phylogenetic inference  
603 under mixed models." *Bioinformatics* 19 (12): 1572-1574.  
604 doi:10.1093/bioinformatics/btg180.
- 605 Savaskan, Nicolai E, Anja U Bräuer, and Robert Nitsch. 2004. "Molecular cloning and  
606 expression regulation of PRG-3, a new member of the plasticity-related gene family."  
607 *European Journal of Neuroscience* 19 (1): 212-220. doi:10.1046/j.1460-  
608 9568.2003.03078.x.
- 609 Sigal, Yury J, Omar A Quintero, Richard E Cheney, and Andrew J Morris. 2007. "Cdc42 and  
610 ARP2/3-independent regulation of filopodia by an integral membrane lipid-phosphatase-  
611 related protein." *Journal of cell science* 120 (2): 340-352. doi:10.1242/jcs.03335.
- 612 Smith, Martin D, Joel O Wertheim, Steven Weaver, Ben Murrell, Konrad Scheffler, and Sergei L  
613 Kosakovsky Pond. 2015. "Less Is More: An Adaptive Branch-Site Random Effects  
614 Model for Efficient Detection of Episodic Diversifying Selection." *Molecular Biology*  
615 *and Evolution* 32 (5): 1342-1353. doi:10.1093/molbev/msv022.
- 616 Sonnhammer, Eric LL, and Volker Hollich. 2005. "Scoredist: A simple and robust protein  
617 sequence distance estimator." *BMC Bioinformatics* 6 (1): 1-8. doi:10.1186/1471-2105-6-  
618 108.
- 619 Stöckel, Daniel, Tim Kehl, Patrick Trampert, Lara Schneider, Christina Backes, Nicole Ludwig,  
620 Andreas Gerasch, et al. 2016. "Multi-omics enrichment analysis using the GeneTrail2  
621 web service." *Bioinformatics* 32 (10): 1502-1508. doi:10.1093/bioinformatics/btv770.

- 622 Suyama, Mikita, David Torrents, and Peer Bork. 2006. "PAL2NAL: robust conversion of protein  
623 sequence alignments into the corresponding codon alignments." *Nucleic Acids Research*  
624 34 (2): W609–W612. doi:10.1093/nar/gkl315.
- 625 Tacutu, Robi, Thomas Craig, Budovsky Arie, Daniel Wuttke, Gilad Lehmann, Dmitri  
626 Taranukha, Joana Costa, Vadim E Fraifeld, and João Pedro de Magalhães. 2013. "Human  
627 Ageing Genomic Resources: Integrated databases and tools for the biology and genetics  
628 of ageing." *Nucleic Acids Research* 41 (D1): D1027–D1033. doi:10.1093/nar/gks1155.
- 629 Tatusov, Roman L, Eugene V Koonin, and David J Lipman. 1997. "A Genomic Perspective on  
630 Protein Families." *Science* 278 (5338): 631-637. doi:10.1126/science.278.5338.631.
- 631 Thompson, Julie D, Desmond G Higgins, and Toby J Gibson. 1994. "CLUSTAL W: improving  
632 the sensitivity of progressive multiple sequence alignment through sequence weighting,  
633 position-specific gap penalties and weight matrix choice." *Nucleic Acids Research* 22  
634 (22): 4673-4680. doi:10.1093/nar/22.22.4673.
- 635 Valdesalici, Stefano, and Alessandro Cellerino. 2003. "Extremely short lifespan in the annual  
636 fish *Nothobranchius furzeri*." *Proceedings of the Royal Society of London. Series B:  
637 Biological Sciences* 270: S189-S191. doi:10.1098/rsbl.2003.0048.
- 638 Villanueva-Cañas, José, Steve Laurie, and M Mar Albà. 2013. "Improving Genome-Wide Scans  
639 of Positive Selection by Using Protein Isoforms of Similar Length." *Genome Biology and  
640 Evolution* 5 (2): 457–467. doi:10.1093/gbe/evt017.
- 641 Wanamaker Jr, Alan D, Jan Heinemeier, James D Scourse, Christopher A Richardson, Paul G  
642 Butler, Jón Eiríksson, and Karen Luise Knudsen. 2008. "Very Long-Lived Mollusks  
643 Confirm 17th Century AD Tephra-Based Radiocarbon Reservoir Ages for North  
644 Icelandic Shelf Waters." *Radiocarbon* 50 (3): 399-412.  
645 doi:10.1017/S0033822200053510.
- 646 Wang, Wei-Zhi, and Zoltán Molnár. 2005. "Dynamic pattern of mRNA expression of plasticity-  
647 related gene-3 (PRG-3) in the mouse cerebral cortex during development." *Brain  
648 Research Bulletin* 66 (4-6): 454-460. doi:10.1016/j.brainresbull.2005.05.010.
- 649 Ward, Natalie, and Gabriel Moreno-Hagelsieb. 2014. "Quickly Finding Orthologs as Reciprocal  
650 Best Hits with BLAT, LAST, and UBLAST: How Much Do We Miss?" *PLoS One* 9 (7):  
651 e101850. doi:10.1371/journal.pone.0101850.
- 652 Weisner, P Anne, Chih-Ying Chen, Younguk Sun, Jennifer Yoo, Wei-Chun Kao, Huimin Zhang,  
653 Emily T Baltz, Joseph M Troy, and Lisa Stubbs. 2019. "A mouse mutation that  
654 dysregulates neighboring Galnt17 and Auts2 genes is associated with phenotypes related  
655 to the human AUTS2 syndrome." *Genes, Genomes, Genetics* 9 (11): 3891-3906.  
656 doi:10.1534/g3.119.400723.
- 657 Wisshak, Max, Matthias López Correa, Serge Gofas, Carmen Salas, Marco Taviani, Joachim  
658 Jakobsen, and André Freiwald. 2009. "Shell architecture, element composition, and stable  
659 isotope signature of the giant deep-sea oyster *Neopycnodonte zibrowii* sp. n. from the NE  
660 Atlantic." *Deep Sea Research Part I: Oceanographic Research Papers* 56 (3): 374-407.  
661 doi:10.1016/j.dsr.2008.10.002.
- 662 Wong, Wendy SW, Ziheng Yang, Nick Goldman, and Rasmus Nielsen. 2004. "Accuracy and  
663 Power of Statistical Methods for Detecting Adaptive Evolution in Protein Coding

- 664 Sequences and for Identifying Positively Selected Sites." *Genetics* 168 (2): 1041-1051.  
665 doi:10.1534/genetics.104.031153.
- 666 Yang, Ziheng. 2007. "PAML 4: Phylogenetic Analysis by Maximum Likelihood." *Molecular*  
667 *biology and evolution* 24 (8): 1586-1591. doi:10.1093/molbev/msm088.
- 668 Yu, Zhenpeng, Inge Seim, Mengxin Yin, Ran Tian, Di Sun, Wenhua Ren, Guang Yang, and  
669 Shixia Xu. 2021. "Comparative analyses of aging-related genes in long-lived mammals  
670 provide insights into natural longevity." *The Innovation* 2 (2): 100108.  
671 doi:10.1016/j.xinn.2021.100108.
- 672 Zhang, Jianzhi, Rasmus Nielsen, and Ziheng Yang. 2005. "Evaluation of an Improved Branch-  
673 Site Likelihood Method for Detecting Positive Selection at the Molecular Level."  
674 *Molecular Biology and Evolution* 22 (12): 2472–2479. doi:10.1093/molbev/msi237.

675 **Table 1: Selected Long-lived Species and Closest Short-lived Phylogenetic Relatives.**

| Long-lived Species   | Maximum Longevity (years) | Short-lived Relative  | Maximum Longevity (years) | Date of MRCA (million years ago) |
|----------------------|---------------------------|-----------------------|---------------------------|----------------------------------|
| <i>B. musculus</i>   | 110                       | <i>D. leucas</i>      | 40                        | 33.5                             |
|                      |                           | <i>L. obliquidens</i> | 46                        | 33.5                             |
| <i>C. abingdonii</i> | 100 to 120                | <i>M. reevesii</i>    | 24.2                      | 68.7                             |

676

677 Long-lived and short-lived species were selected based on availability of reference genomes and  
678 proteome files from NCBI and reported maximum longevity falling outside the 95% CI for  
679 human life expectancy. Maximum longevity are those reported in the AnAge database, except  
680 for *Chelonoidis abingdonii*. MRCA date estimates are those reported in the TimeTree database  
681 and represent the date of the most recent common ancestor between the long-lived species and the  
682 listed short-lived relative.

683 **Table 2: Estimated Maximum Lifespans and Longevity Quotients for Selected Species.**

| Species               | Reported<br>Maximum<br>Longevity<br>(years) | CpG<br>Dinucleotide<br>Estimated<br>Lifespan (years) | Allometrically<br>Estimated<br>Lifespan (years) | Longevity<br>Quotient (LQ) |
|-----------------------|---------------------------------------------|------------------------------------------------------|-------------------------------------------------|----------------------------|
| <i>B. musculus</i>    | 110                                         | > 205                                                | 85.3                                            | 1.29                       |
| <i>D. leucas</i>      | 40                                          | 39.7                                                 | 45.3                                            | 0.88                       |
| <i>L. obliquidens</i> | 46                                          | 41.8                                                 | 31.4                                            | 1.46                       |
| <i>C. abingdonii</i>  | 100 to 120                                  | 120.6                                                | 49.5                                            | 2.02 to 2.42               |
| <i>M. reevesii</i>    | 24.2                                        | 52.5                                                 | 29.3                                            | 0.82                       |

684  
685 Maximum longevities are those reported in the AnAge database, except for *Chelonoidis*  
686 *abingdonii*. The LQ estimates for *Chelonoidis abingdonii* reflect those for the upper and lower  
687 lifespan estimates.
